# Supplementary material for: Loss of the KN Motif and AnKyrin Repeat Domain 1 (KANK1) Leads to Lymphoid Compartment Dysregulation in Murine Model
Source: MDPI journal article supplement (doi:10.3390/genes14101947), 2023-10-16

Supp. Figure S1

a

i Patient

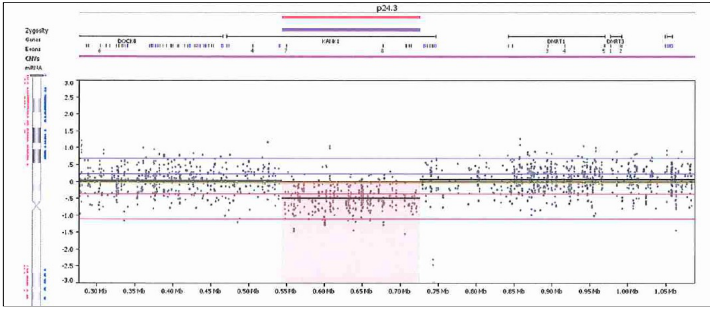

ii Father

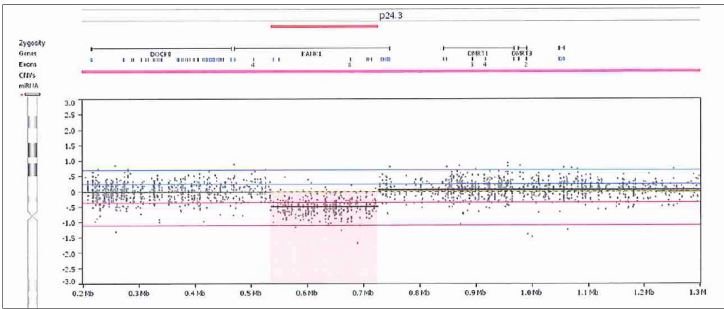

iii Mother

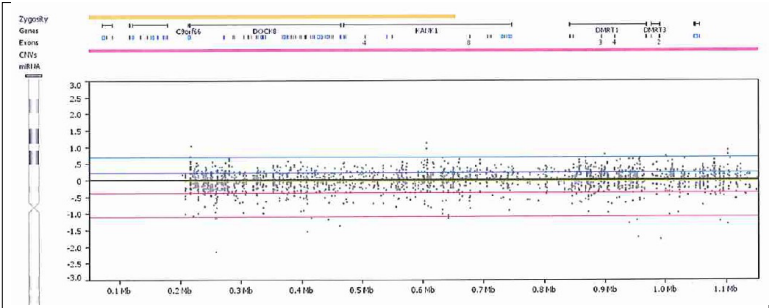

b

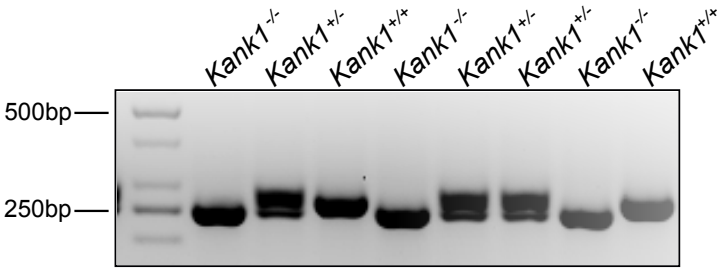

d

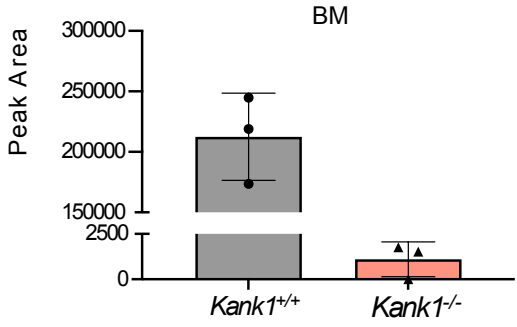

c

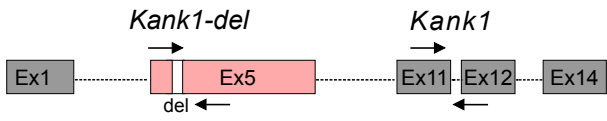

i

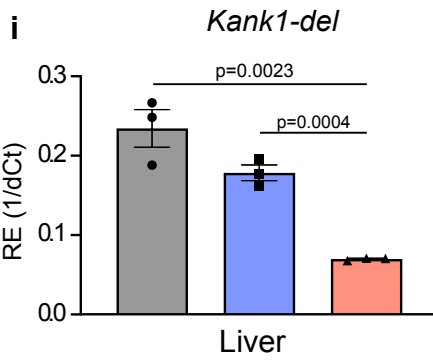

ii

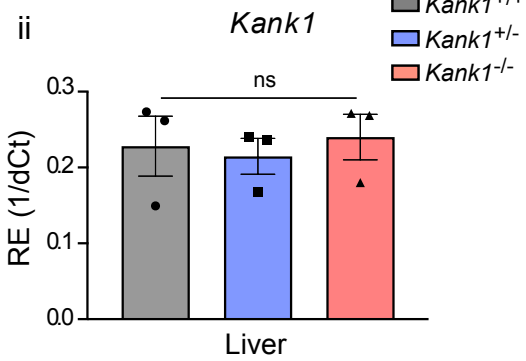

Supp. Figure S1

e

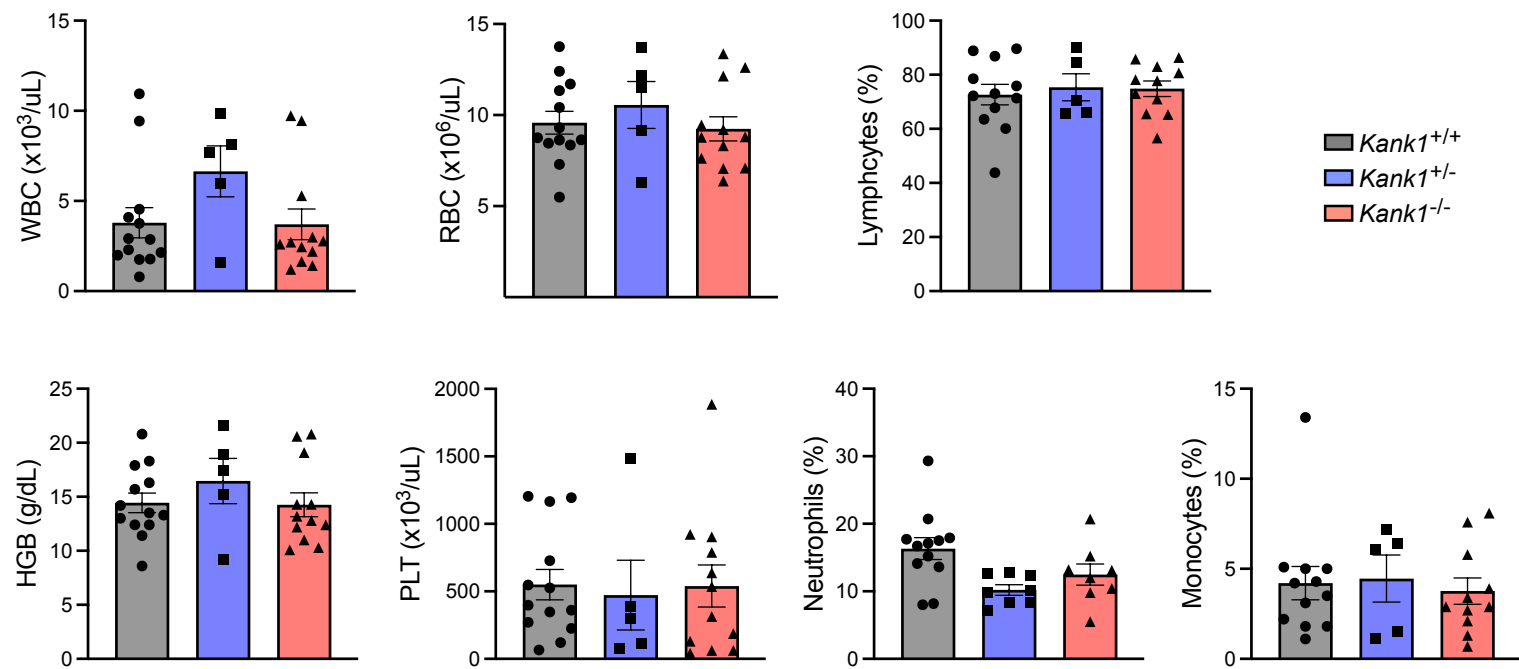

f

Percentage of HSPCs populations in BM of adult mice

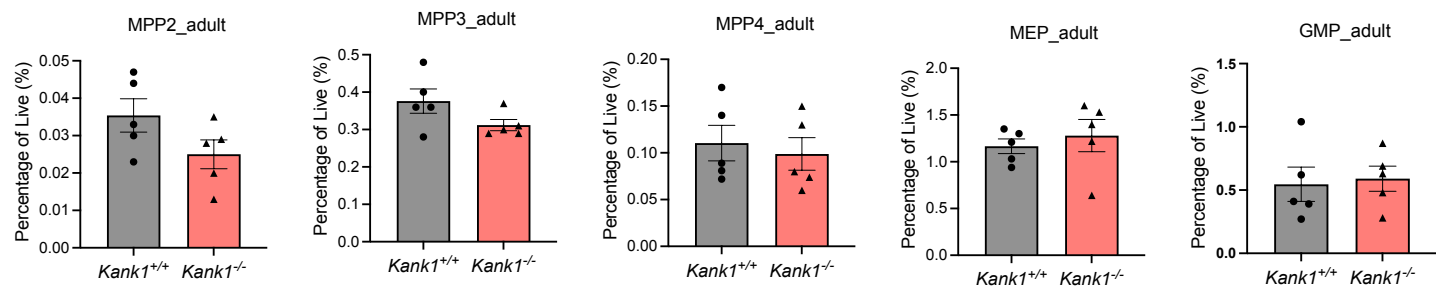

g

Percentage of HSPCs populations in BM of old mice

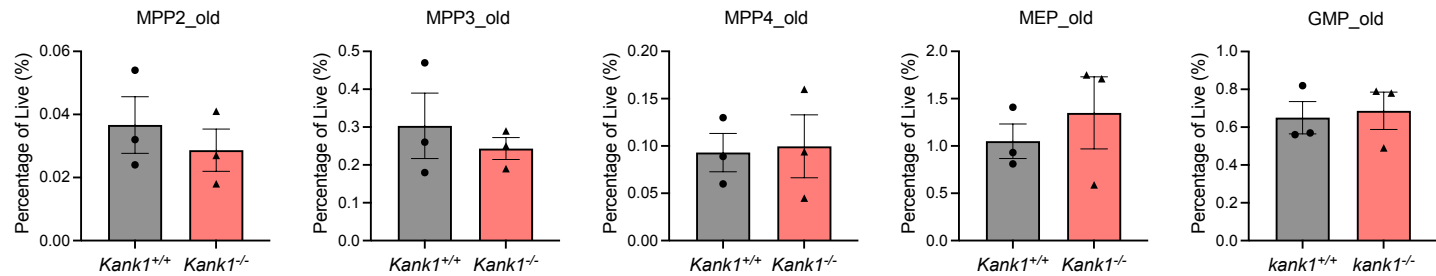

Supp. Figure S1

h

HSPCs populations gating strategy

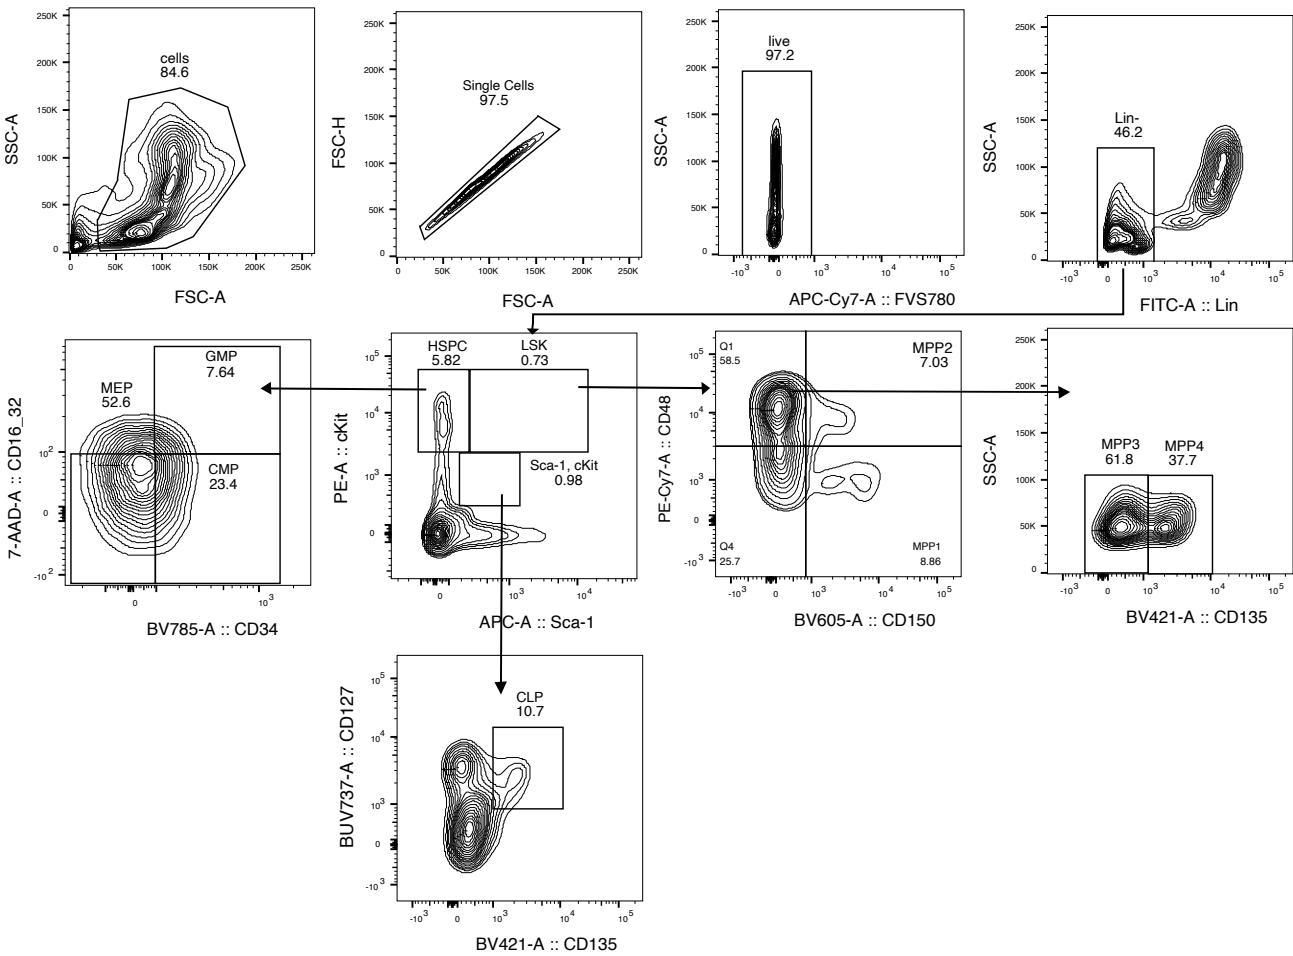

Supp. Figure S1

i

Percentage of Lineage populations in BM of adult mice

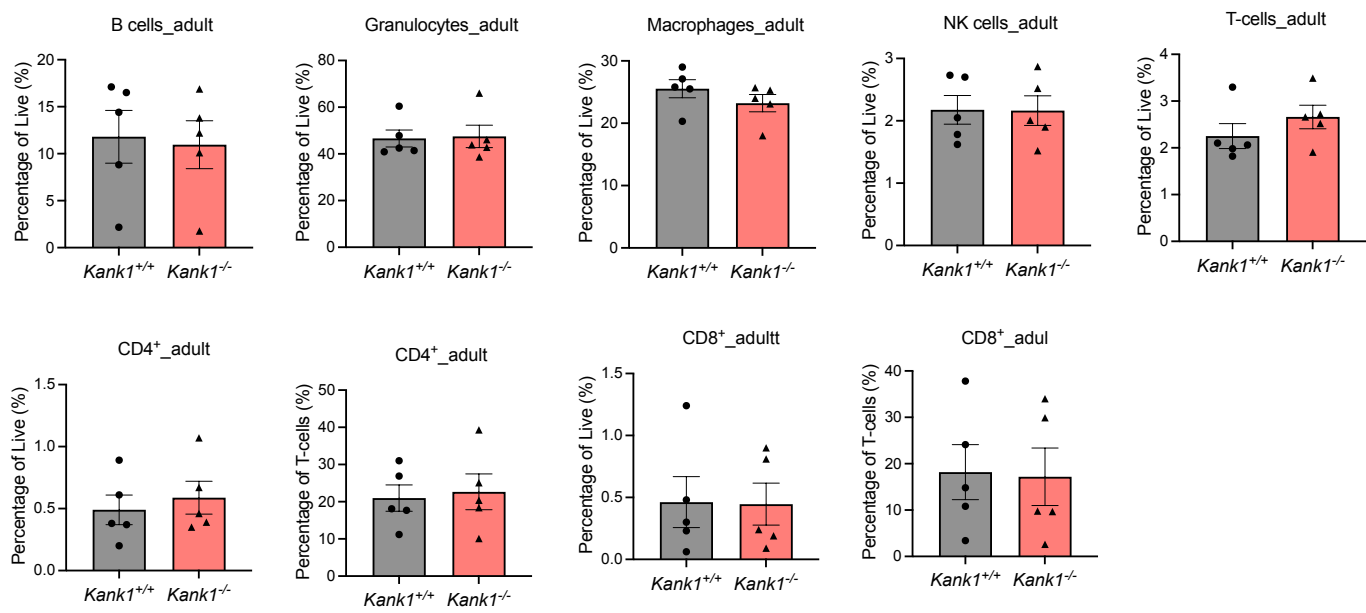

j

Percentage of Lineage populations in BM of old mice

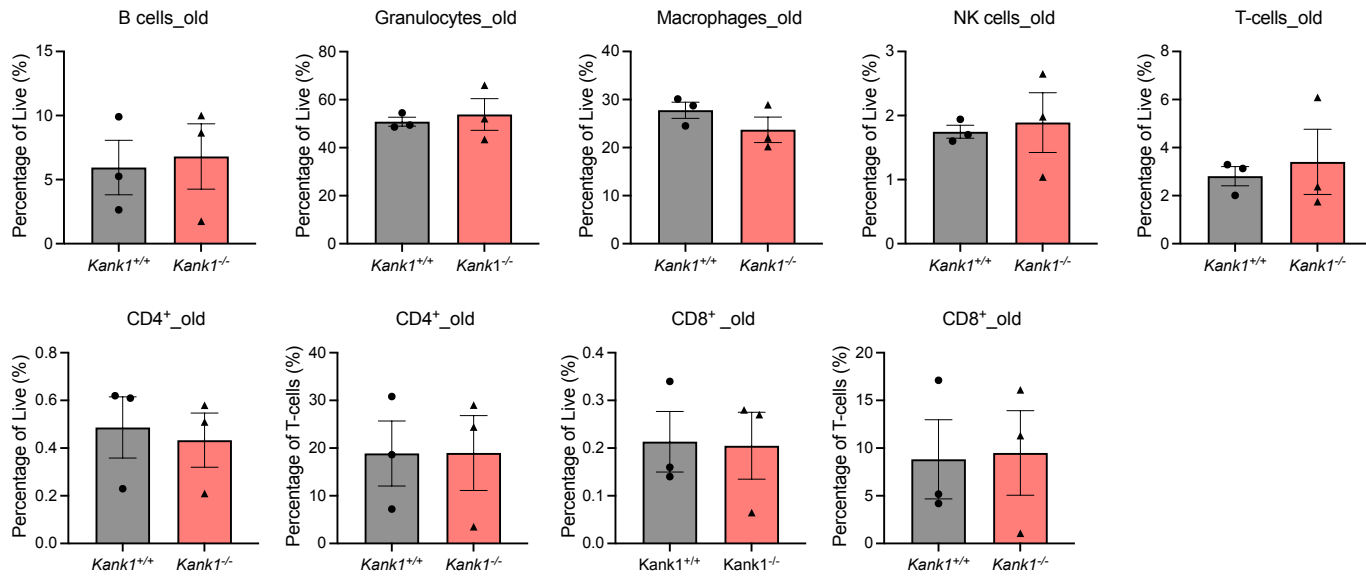

Supp. Figure S1

k

Lineage populations gating strategy

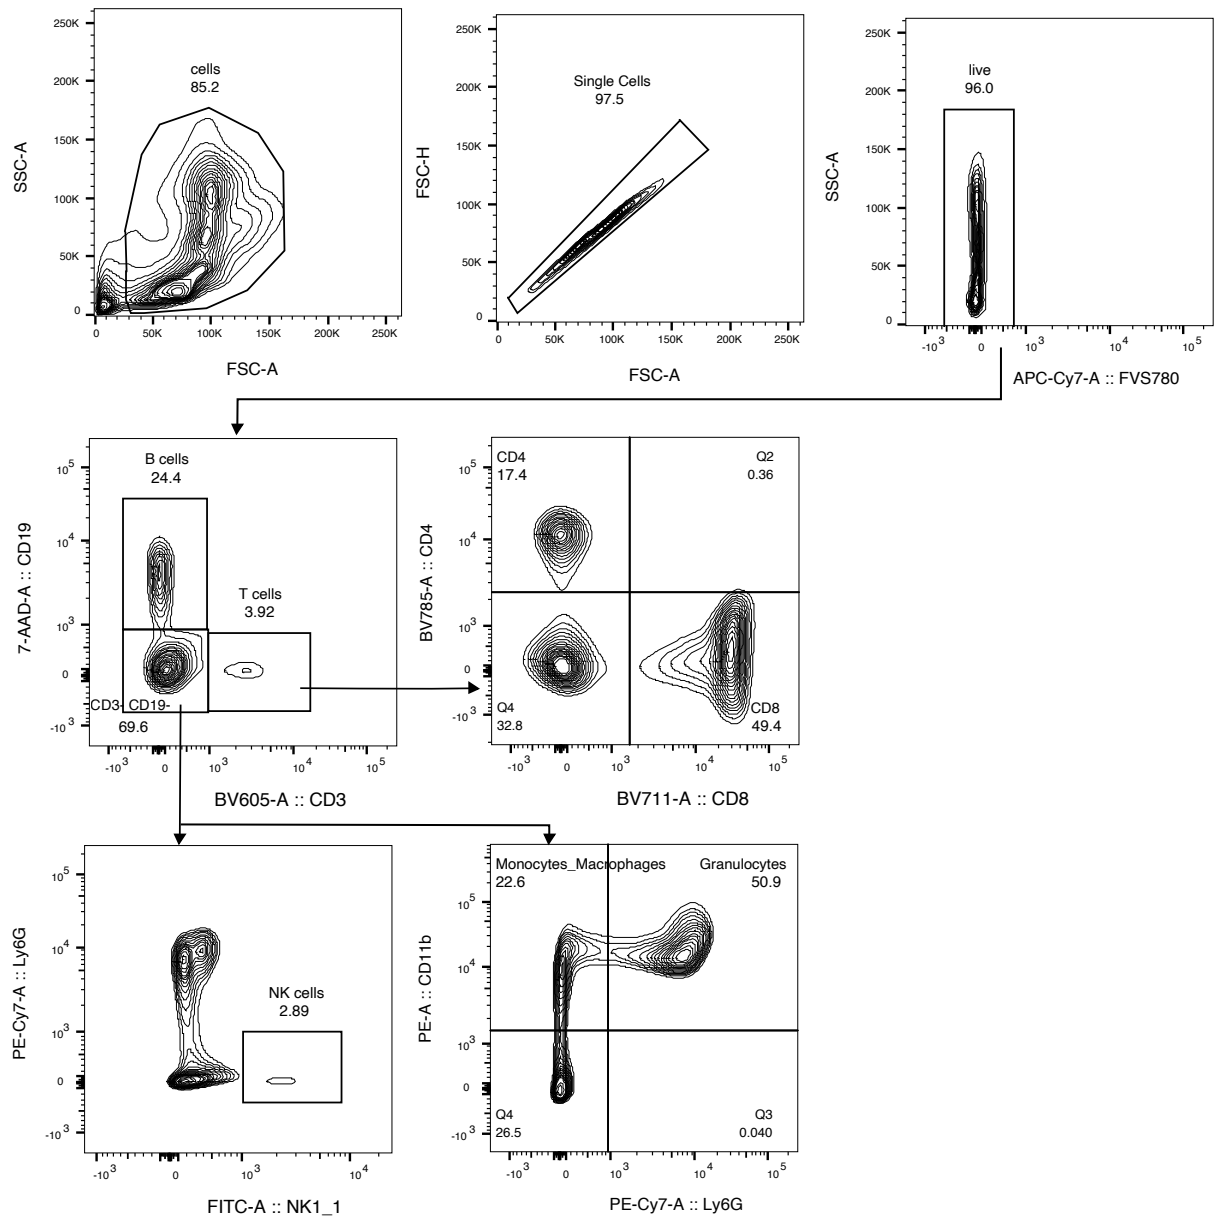

l

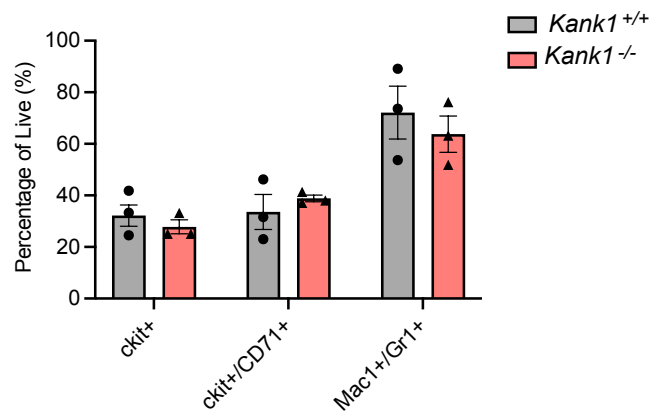

# Supp. Figure S1

m

1st plating

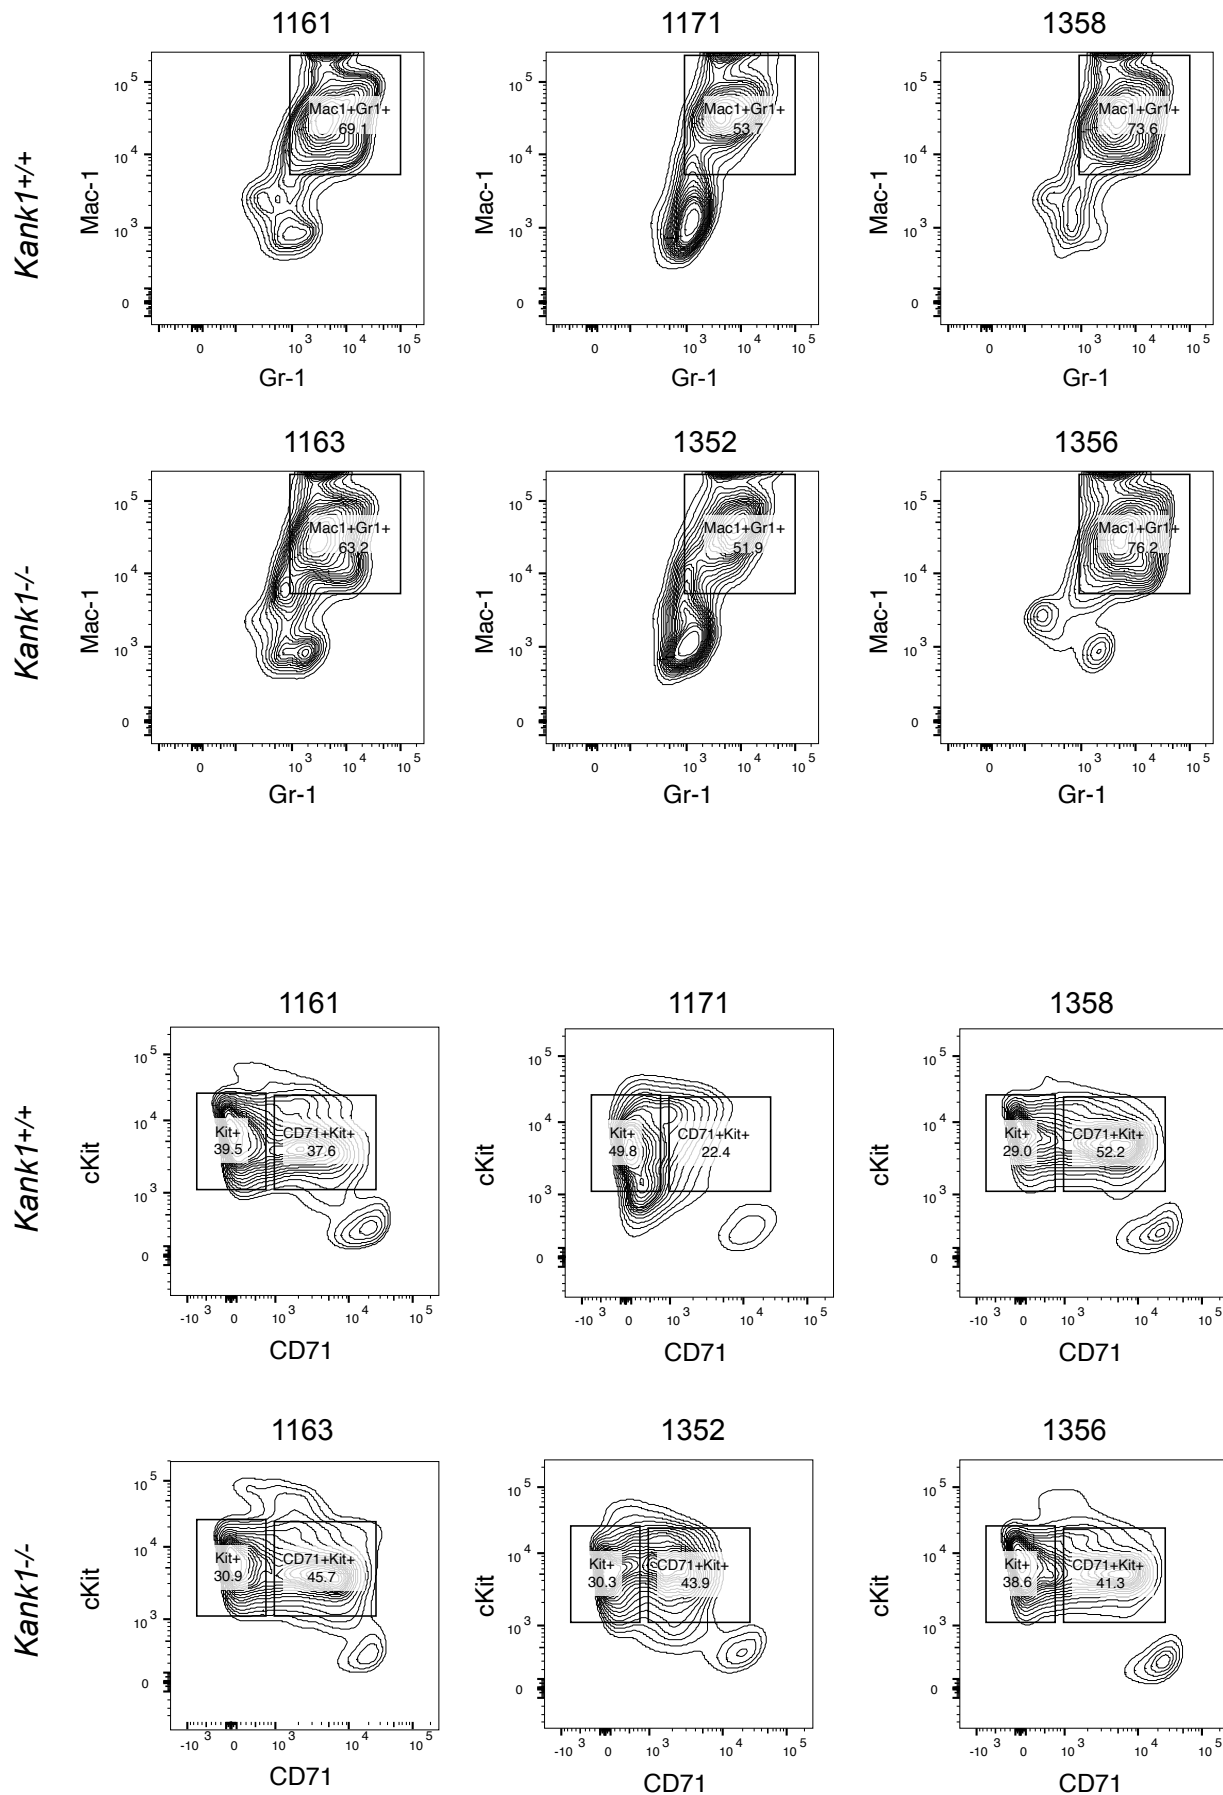

Supp. Figure S1

n

2nd plating

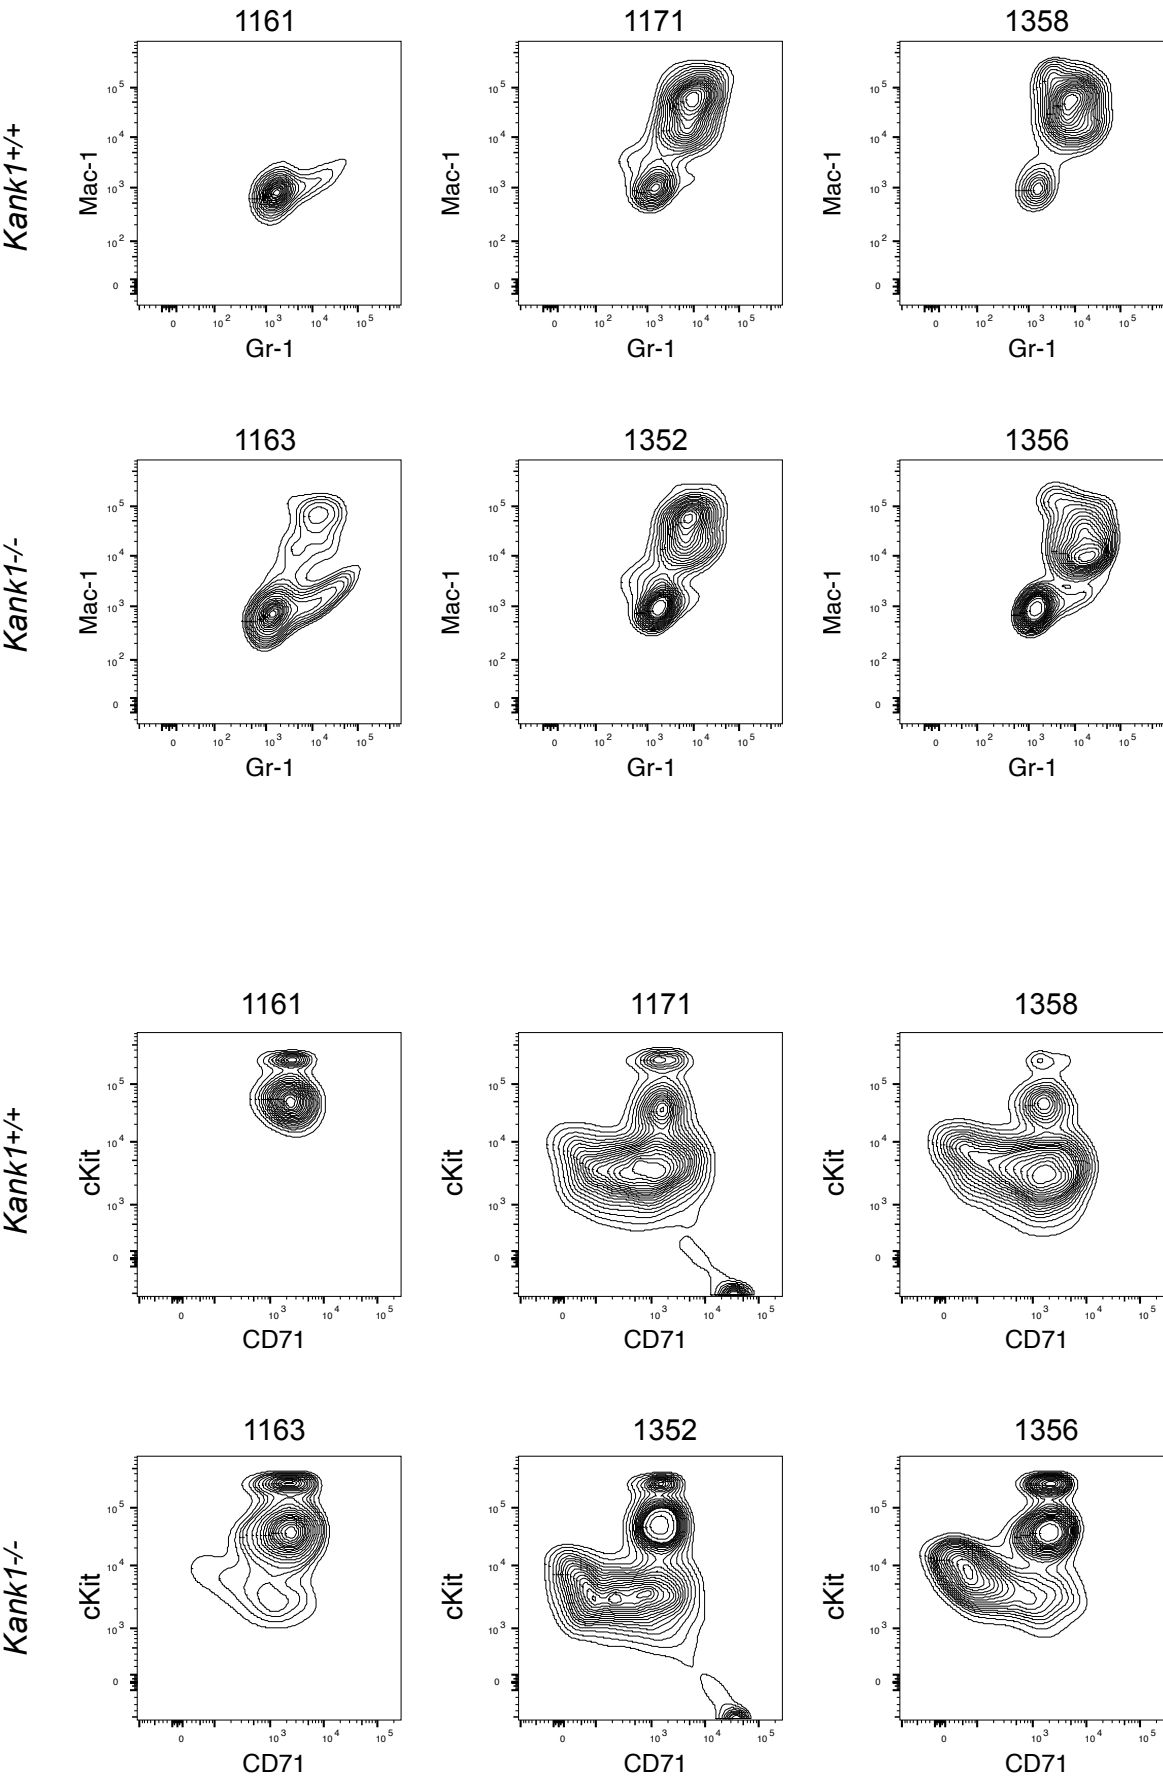

Supp. Figure S1

o

3rd plating

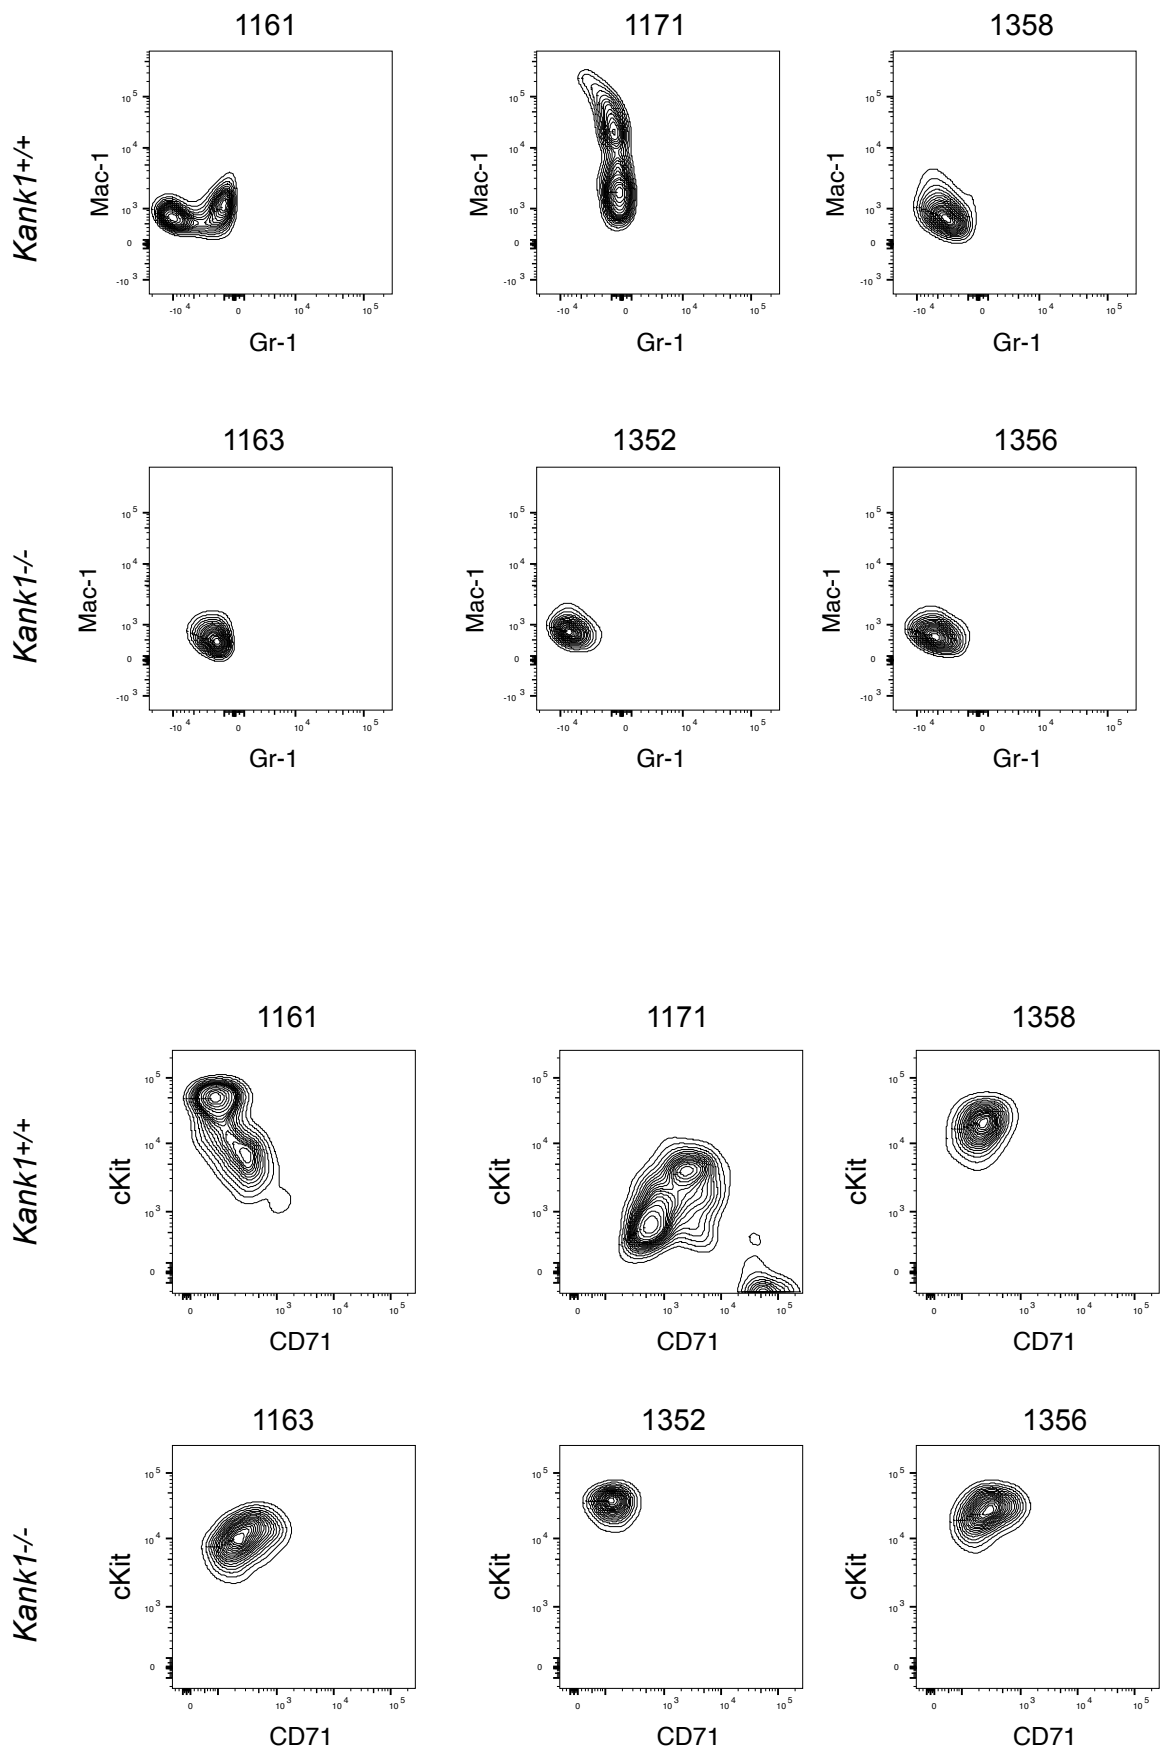



Supp. Figure S2

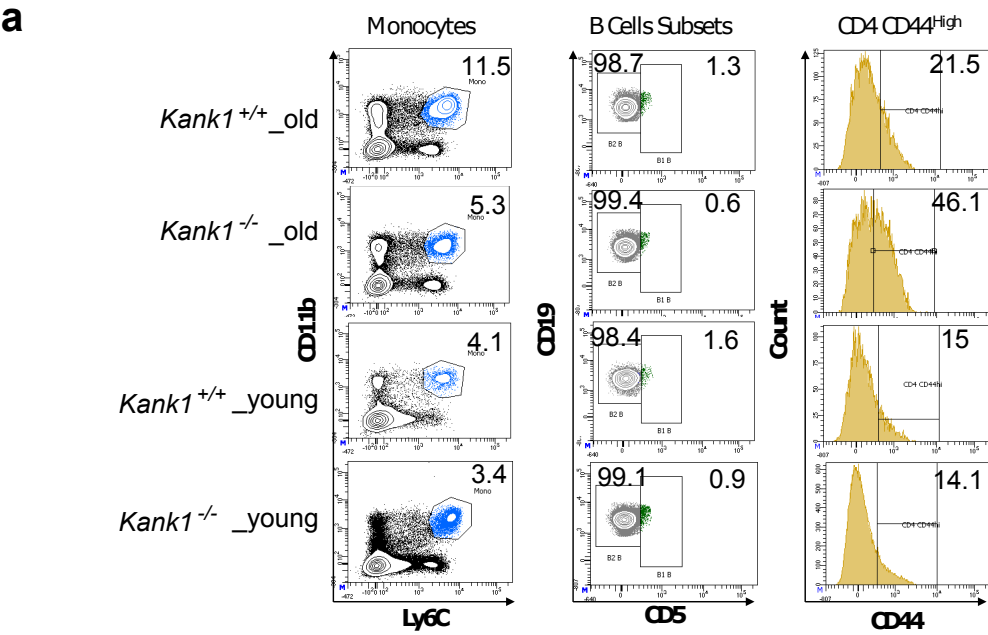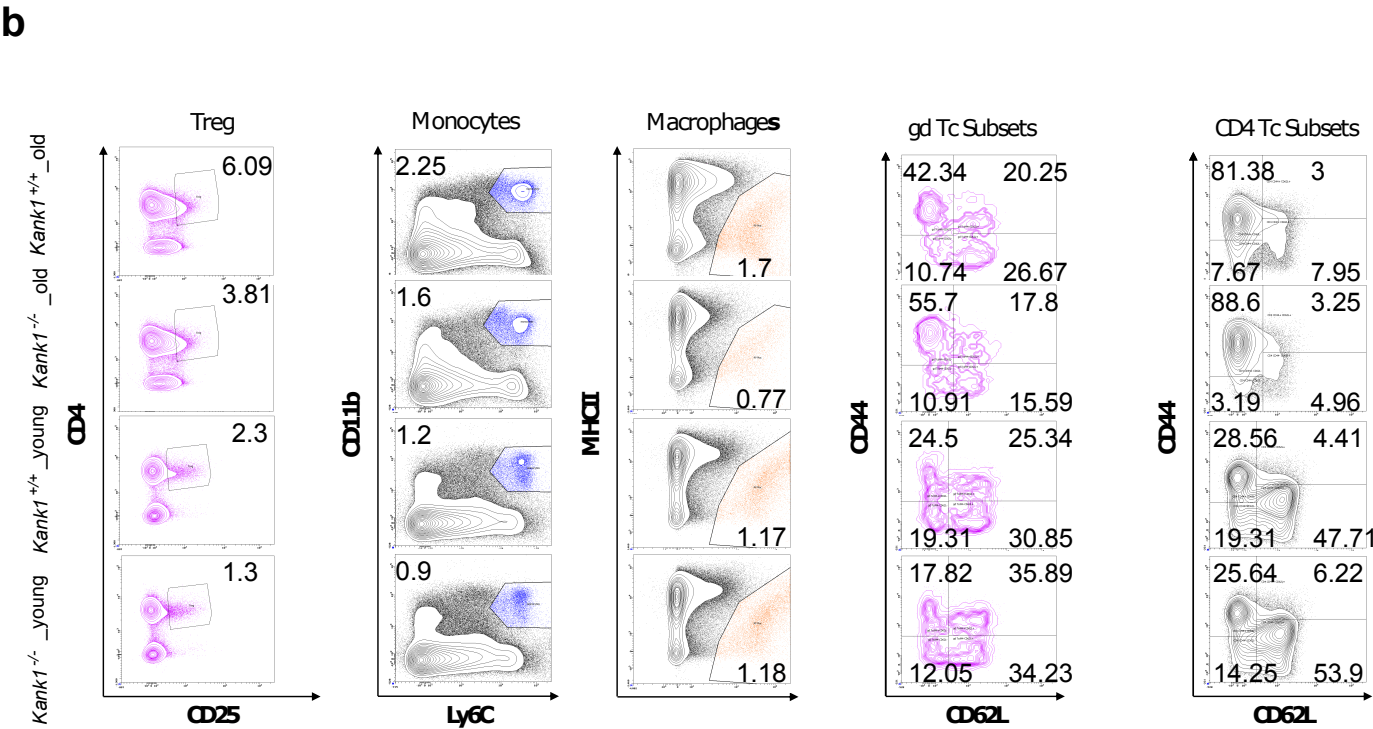

Supp. Figure S2

c

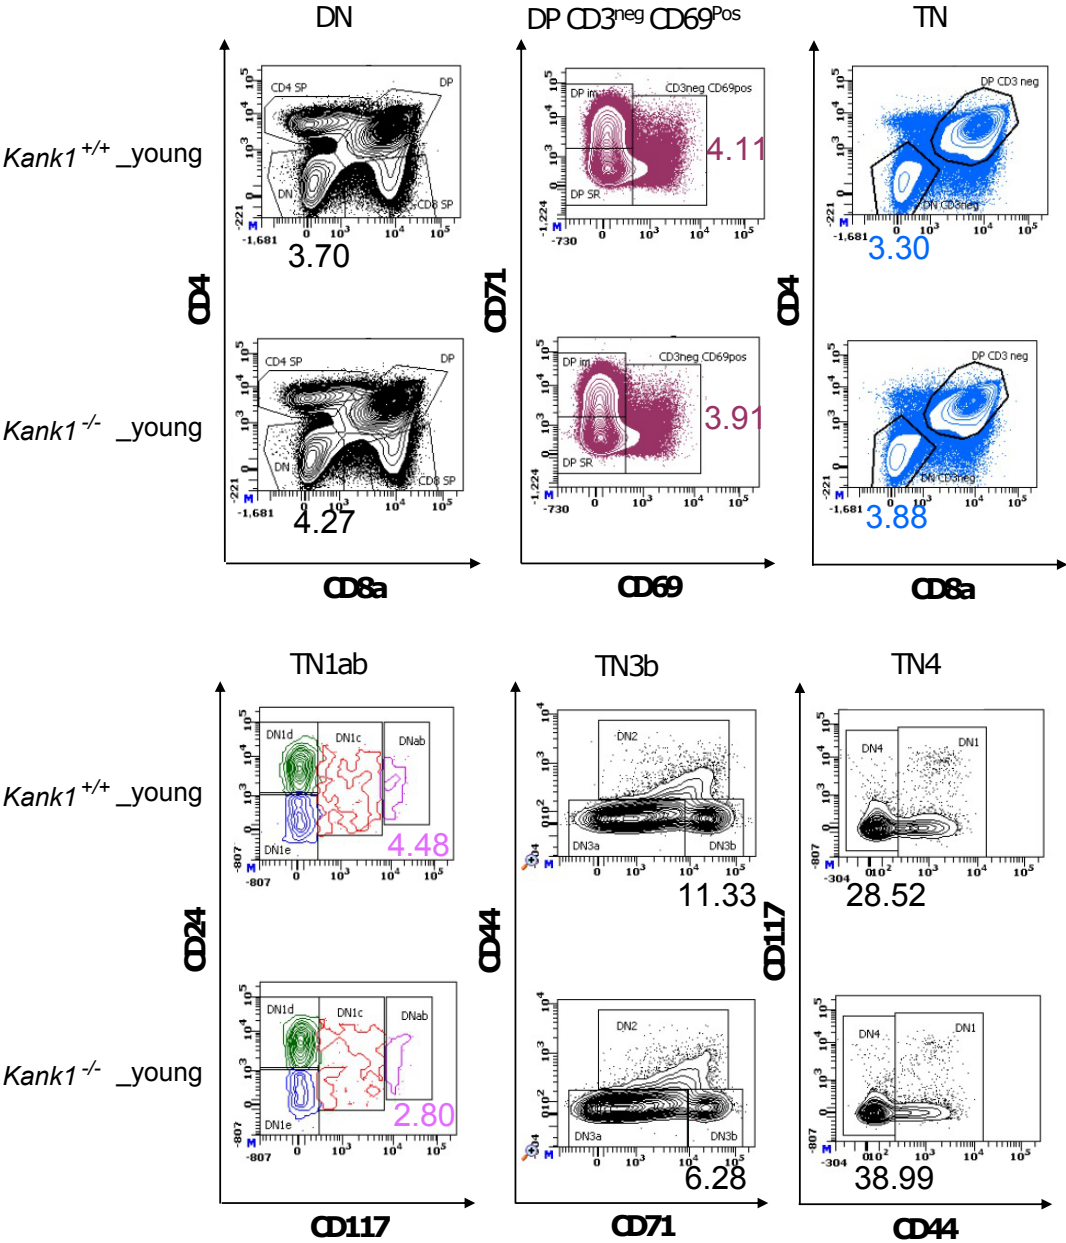

Supplement: s1 [file s1]
